# Supplementary material for: Sodium-Alginate-Functionalized Silver Nanoparticles for Colorimetric Detection of Dimethoate
Source: MDPI journal article supplement (doi:10.3390/bios12121086), 2022-11-28
Supplement: s1 [file s1]

# Sodium-Alginate-Functionalized Silver Nanoparticles for Colorimetric Detection of Dimethoate

Feng-Zuo Zhou <sup>1</sup>, Yung-Hsiang Chang <sup>2</sup>, Cho-Chun Hu <sup>1</sup> and Tai-Chia Chiu <sup>1,\*</sup>

<sup>1</sup> Department of Applied Science, National Taitung University, Taitung, Taiwan

<sup>2</sup> Institute of Biochemical and Biomedical Engineering, National Taipei University of Technology, Taipei, Taiwan

\* Correspondence: tcchiu@nttu.edu.tw; Tel.: +886-89-517-990

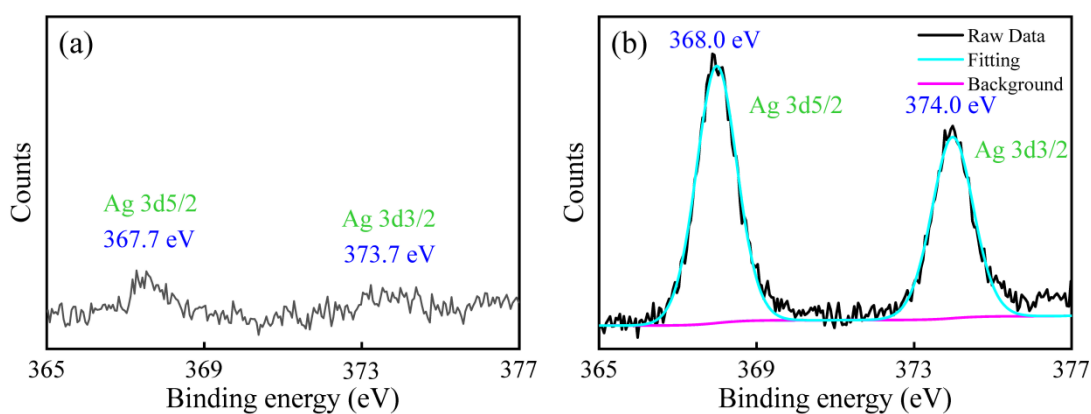

**Figure S1.** High-resolution Ag 3d XPS spectra of (a) SA-AgNPs and (b) SA-AgNPs with dimethoate.

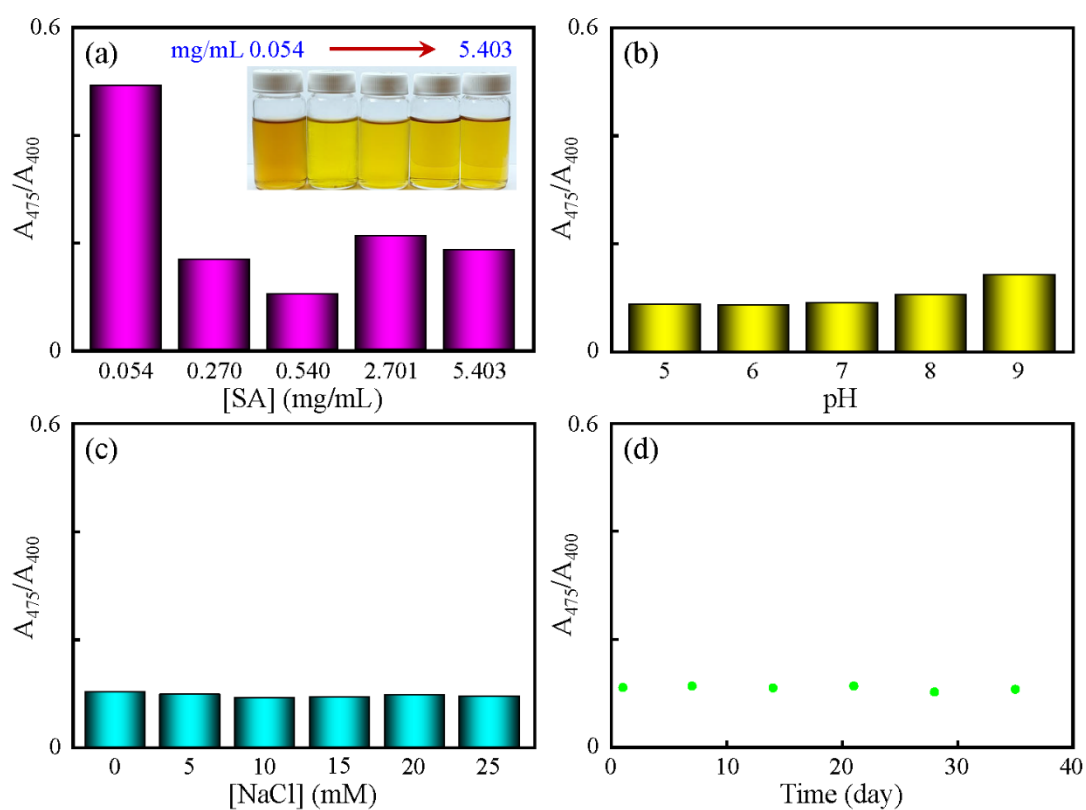

**Figure S2.** Effect of (a) the amount of SA, (b) pH, (c) NaCl concentrations, and (d) storage time on the absorption ratio  $A_{475}/A_{400}$  of SA-AgNPs. Inset: the images of various amounts of SA stabilized AgNPs.

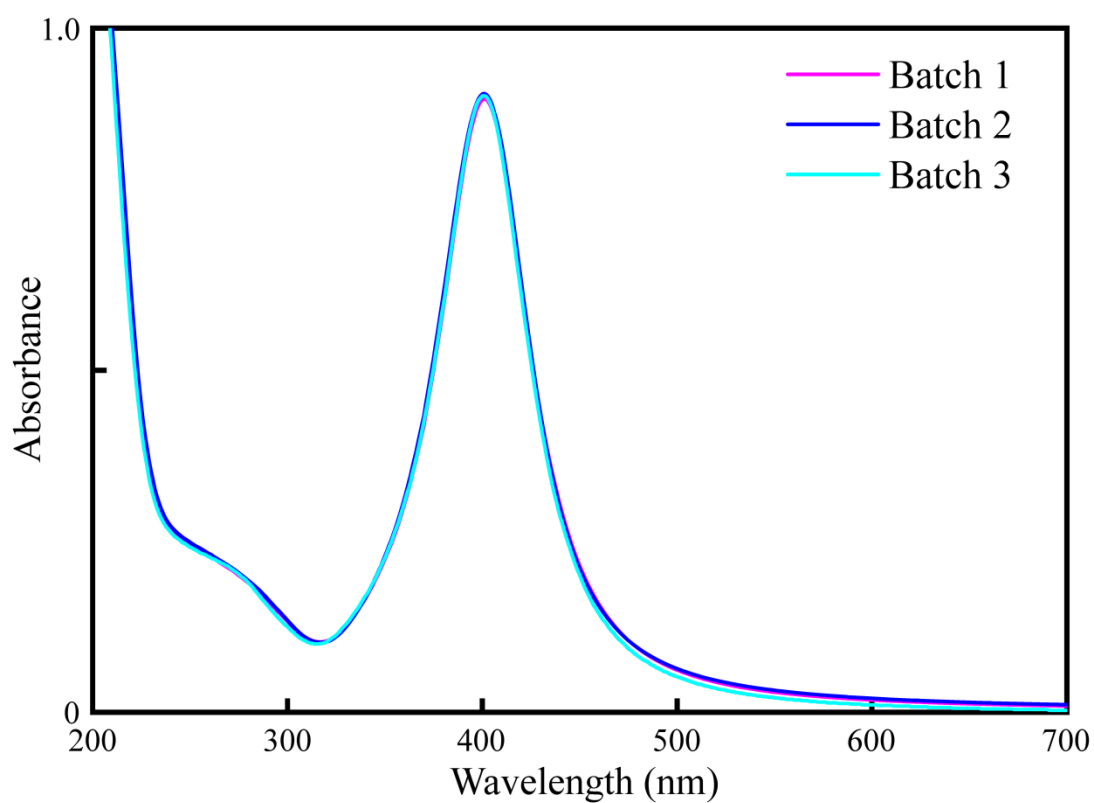

**Figure S3.** The batch-to-batch reproducibility for the preparation of the SA-AgNPs.

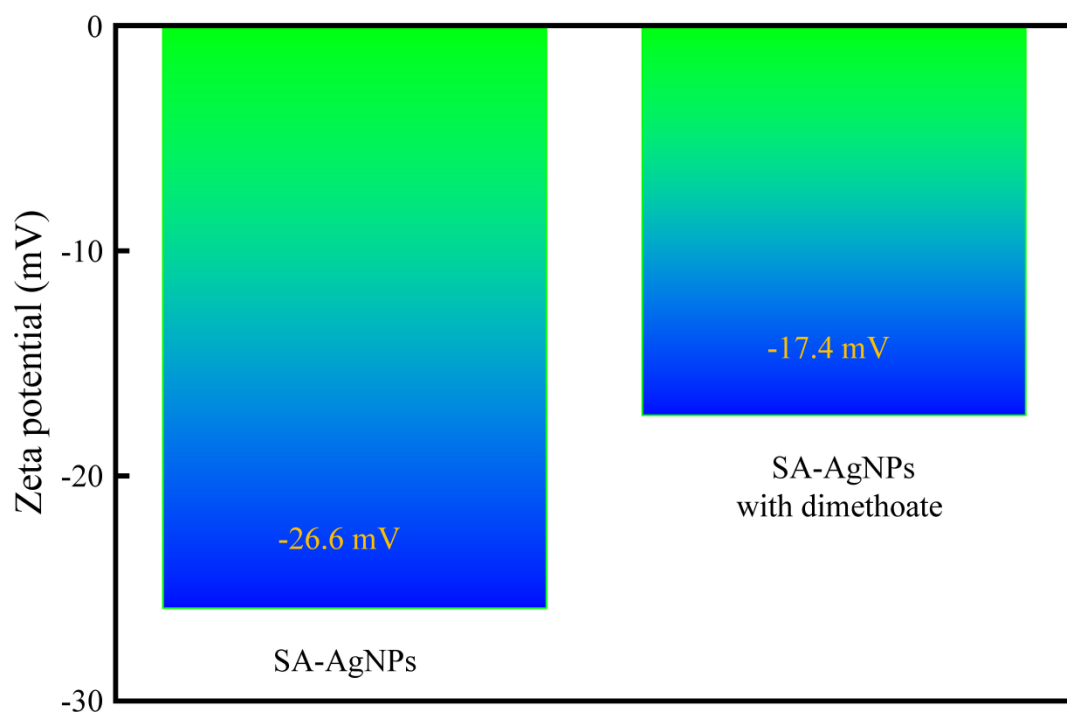

**Figure S4.** Zeta potentials of SA-AgNPs and SA-AgNPs with dimethoate (10 ppm).

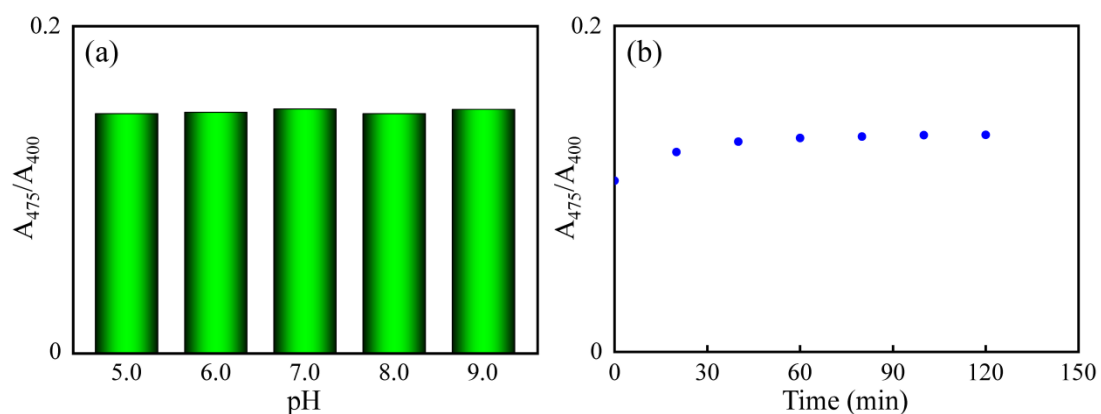

**Figure S5.** Effect of (a) pH and (b) incubation time on the absorption ratio of  $A_{475}/A_{400}$  of SA-AgNPs with dimethoate.

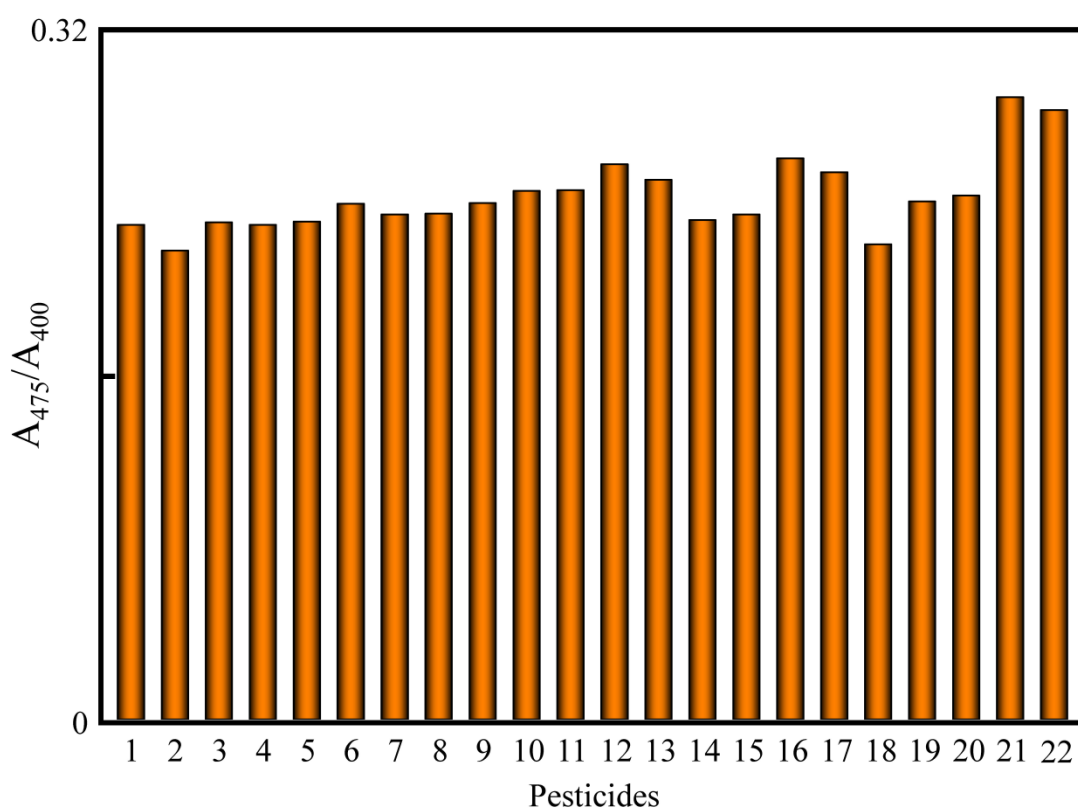

**Figure S6.** The absorption ratio ( $A_{475}/A_{400}$ ) of the SA-AgNPs towards dimethoate with other pesticides in the lake water samples. The peak identifies are the same as Figure 5.

**Table S1.** XPS results of elemental analysis.

| Sample                   | Atomic concentration of element (%) |       |      |       |      |      |
|--------------------------|-------------------------------------|-------|------|-------|------|------|
|                          | Ag 3d                               | C 1s  | N 1s | O 1s  | S 2p | P 2P |
| SA-AgNPs                 | 0.04                                | 54.19 | 5.43 | 40.33 | —    | —    |
| SA-AgNPs with dimethoate | 0.11                                | 63.82 | 4.61 | 31.15 | 0.17 | 0.13 |
